# Supplementary material
Source: PubMed Central journal article supplement (PMC6456852)
Supplement: JB.00033-19-s0001.pdf [file JB.00033-19-s0001.pdf]

**Supplemental Material for:**

**Natural strain variation reveals diverse biofilm regulation in squid-colonizing *Vibrio fischeri***

Ella R. Rotman, Katherine M. Bultman, John F. Brooks II, Mattias C. Gyllborg, Hector L. Burgos, Michael S. Wollenberg, Mark J. Mandel

**SUPPLEMENTAL FILES**

**Table S1 (PDF). Primer pairs for construction of the deletion mutants.** Detailed oligonucleotide and construction details for deletions and the MJM1100 *sypE*(ntG33Δ) and MJM1130 *sypE*(nt33::G) strains.

**File S1 (PDF). Sequence of the synthetic dsDNA, gBlock\_erm.** The sequence is provided in FASTA format printed as PDF.

Table S1. Primers pairs for construction of mutants.

| Strain                                                                                                                       | Note | Forward Primer                                                                               | Reverse Primer                                                                               | PCR Product Size                       | Description of PCR product                                                                                                                                                                                                                                                                                                                   | E. coli with clone                             |
|------------------------------------------------------------------------------------------------------------------------------|------|----------------------------------------------------------------------------------------------|----------------------------------------------------------------------------------------------|----------------------------------------|----------------------------------------------------------------------------------------------------------------------------------------------------------------------------------------------------------------------------------------------------------------------------------------------------------------------------------------------|------------------------------------------------|
| <b>MJM3010 =</b><br><b>MJM1100 <math>\Delta</math>rscS and</b><br><b>MJM3394 =</b><br><b>MJM3354 <math>\Delta</math>rscS</b> |      | Gib_ES114_rscS_US_for<br>Gib_ES114_rscS_DS_for<br>ES114_US_ver<br>ES114_US_ver               | Gib_ES114_rscS_US_rev<br>Gib_ES114_rscS_DS_rev<br>ES114_DS_ver<br>DAT015F                    | 1.6 kb<br>1.6 kb<br>586 bp<br>520 bp   | Gibson assembly cloning of upstream <i>rscS</i> region in MJM1100 into pEVs79<br>Gibson assembly cloning of downstream <i>rscS</i> region in MJM1100 into pEVs79<br>Verification of $\Delta$ rscS by flanking the upstream/downstream junction<br>Verification of $\Delta$ rscS; no product due to one primer binding within <i>rscS</i> .   | <b>MJM3008</b>                                 |
| <b>MJM3017 =</b><br><b>MJM1117 <math>\Delta</math>rscS</b>                                                                   |      | Gib_ES114_rscS_US_for<br>Gib_ES114_rscS_DS_for<br>ES114_US_ver<br>ES114_US_ver               | Gib_ES213_rscS_US_rev<br>Gib_ES114_rscS_DS_rev<br>ES114_DS_ver<br>DAT015F                    | 1.6 kb<br>1.6 kb<br>586 bp<br>520 bp   | Gibson assembly cloning of upstream <i>rscS</i> region in MJM1117 into pEVs79<br>Gibson assembly cloning of downstream <i>rscS</i> region in MJM1117 into pEVs79<br>Verification of $\Delta$ rscS by flanking the upstream/downstream junction<br>Verification of $\Delta$ rscS; no product due to one primer binding within <i>rscS</i> .   | <b>MJM3014</b>                                 |
| <b>MJM3046 =</b><br><b>MJM1130 <math>\Delta</math>rscS</b>                                                                   |      | Gib_ES114_rscS_US_for<br>Gib_ES114_rscS_DS_for<br>ES114_US_ver<br>ES114_US_ver               | Gib_ES114_rscS_US_rev<br>Gib_ES114_rscS_DS_rev<br>ES114_DS_ver<br>DAT015F                    | 1.6 kb<br>1.6 kb<br>586 bp<br>520 bp   | Gibson assembly cloning of upstream <i>rscS</i> region in MJM1130 into pEVs79<br>Gibson assembly cloning of downstream <i>rscS</i> region in MJM1130 into pEVs79<br>Verification of $\Delta$ rscS by flanking the upstream/downstream junction<br>Verification of $\Delta$ rscS; no product due to one primer binding within <i>rscS</i>     | <b>MJM3043</b>                                 |
| <b>MJM3042 =</b><br><b>MJM2114 <math>\Delta</math>rscS</b>                                                                   |      | Gib_ES114_rscS_US_for<br>Gib_ES114_rscS_DS_for<br>ES114_US_ver<br>ES114_US_ver               | Gib_ES114_rscS_US_rev<br>Gib_ES114_rscS_DS_rev<br>ES114_DS_ver<br>DAT015F                    | 1.6 kb<br>1.6 kb<br>586 bp<br>520 bp   | Gibson assembly cloning of upstream <i>rscS</i> region in MJM2114 into pEVs79<br>Gibson assembly cloning of downstream <i>rscS</i> region in MJM2114 into pEVs79<br>Verification of $\Delta$ rscS by flanking the upstream/downstream junction<br>Verification of $\Delta$ rscS; no product due to one primer binding within <i>rscS</i>     | <b>MJM3039</b>                                 |
| <b>MJM3062 =</b><br><b>MJM1100 <math>\Delta</math>sypA-R</b>                                                                 |      | Gib_ES114_syp_US_for<br>Gib_ES114_syp_DS_for<br>Syp_ver_US_for<br>Syp_ver_US_for             | Gib_ES114_syp_US_rev<br>Gib_ES114_syp_DS_rev<br>Syp_ver_DS_rev<br>sypA_out                   | 1.6 kb<br>1.6 kb<br>503 bp<br>490 bp   | Gibson assembly cloning of upstream <i>sypA</i> region in MJM1100 into pEVs79<br>Gibson assembly cloning of downstream <i>sypR</i> region in MJM1100 into pEVs79<br>Verification of $\Delta$ sypA-R by flanking the upstream/downstream junction<br>Verification of $\Delta$ sypA-R; no product due to one primer binding within <i>sypA</i> | <b>MJM3060</b>                                 |
| <b>MJM3068 =</b><br><b>MJM1117 <math>\Delta</math>sypA-R</b>                                                                 |      | Gib_ES114_syp_US_for<br>Gib_MB11B1_syp_DS_for<br>Syp_ver_US_for<br>Syp_ver_US_for            | Gib_ES114_syp_US_rev<br>Gib_ES114_syp_DS_rev<br>Syp_ver_DS_rev<br>sypA_out                   | 1.6 kb<br>1.6 kb<br>503 bp<br>490 bp   | Gibson assembly cloning of upstream <i>sypA</i> region in MJM1117 into pEVs79<br>Gibson assembly cloning of downstream <i>sypR</i> region in MJM1117 into pEVs79<br>Verification of $\Delta$ sypA-R by flanking the upstream/downstream junction<br>Verification of $\Delta$ sypA-R; no product due to one primer binding within <i>sypA</i> | <b>MJM3066</b>                                 |
| <b>MJM3501 =</b><br><b>MJM1125 <math>\Delta</math>sypA-R</b>                                                                 |      | Gib_SR5_syp_US_for<br>Gib_SR5_syp_DS_for<br>SR5_syp_ver_for<br>Gib_SR5_syp_US_for            | Gib_SR5_syp_US_rev<br>Gib_SR5_syp_DS_rev<br>SR5_syp_ver_rev<br>sypA_out                      | 1.6 kb<br>1.6 kb<br>506 bp<br>1.9 kb   | Gibson assembly cloning of upstream <i>sypA</i> region in MJM1125 into pEVs79<br>Gibson assembly cloning of downstream <i>sypR</i> region in MJM1125 into pEVs79<br>Verification of $\Delta$ sypA-R by flanking the upstream/downstream junction<br>Verification of $\Delta$ sypA-R; no product due to one primer binding within <i>sypA</i> | <b>MJM3500</b>                                 |
| <b>MJM3065 =</b><br><b>MJM1130 <math>\Delta</math>sypA-R</b>                                                                 |      | Gib_MB11B1_syp_US_for<br>Gib_MB11B1_syp_DS_for<br>Syp_ver_US_for<br>Syp_ver_US_for           | Gib_MB11B1_syp_US_rev<br>Gib_ES114_syp_DS_rev<br>Syp_ver_DS_rev<br>sypA_out                  | 1.6 kb<br>1.6 kb<br>503 bp<br>490 bp   | Gibson assembly cloning of upstream <i>sypA</i> region in MJM1130 into pEVs79<br>Gibson assembly cloning of downstream <i>sypR</i> region in MJM1130 into pEVs79<br>Verification of $\Delta$ sypA-R by flanking the upstream/downstream junction<br>Verification of $\Delta$ sypA-R; no product due to one primer binding within <i>sypA</i> | <b>MJM3063</b>                                 |
| <b>MJM3071 =</b><br><b>MJM2114 <math>\Delta</math>sypA-R</b>                                                                 |      | Gib_ES114_syp_US_for<br>Gib_ES114_syp_DS_for<br>Syp_ver_US_for<br>Syp_ver_US_for             | Gib_ES114_syp_US_rev<br>Gib_ES114_syp_DS_rev<br>Syp_ver_DS_rev<br>sypA_out                   | 1.6 kb<br>1.6 kb<br>503 bp<br>490 bp   | Gibson assembly cloning of upstream <i>sypA</i> region in MJM2114 into pEVs79<br>Gibson assembly cloning of downstream <i>sypR</i> region in MJM2114 into pEVs79<br>Verification of $\Delta$ sypA-R by flanking the upstream/downstream junction<br>Verification of $\Delta$ sypA-R; no product due to one primer binding within <i>sypA</i> | <b>MJM3069</b>                                 |
| <b>MJM3084 =</b><br><b>MJM1130 <math>\Delta</math>binK</b>                                                                   |      | Gib_ES114_binK_US_for<br>Gib_ES114_binK_DS_for<br>JFB_287_MB11B1<br>JFB_287_MB11B1           | Gib_ES114_binK_US_rev<br>Gib_ES114_binK_DS_rev<br>JFB_288<br>JFB_365                         | 1.6 kb<br>1.6 kb<br>767 bp<br>624 bp   | Gibson assembly cloning of upstream <i>binK</i> region in MJM1130 into pEVs79<br>Gibson assembly cloning of downstream <i>binK</i> region in MJM1130 into pEVs79<br>Verification of $\Delta$ binK by flanking the upstream/downstream junction<br>Verification of $\Delta$ binK; no product due to one primer binding within <i>binK</i>     | <b>MJM3082</b>                                 |
| <b>MJM3417 =</b><br><b>MJM1100 <math>\Delta</math>sypE and</b><br><b>MJM3423 =</b><br><b>MJM3010 <math>\Delta</math>sypE</b> |      | Gib_ES114_sypE_US_for<br>Gib_ES114_sypE_DS_for<br>syp4F<br>syp5F                             | Gib_ES114_sypE_US_rev<br>Gib_ES114_sypE_DS_rev<br>syp4R<br>syp4R                             | 1.6 kb<br>1.6 kb<br>780 bp<br>772 bp   | Gibson assembly cloning of upstream <i>sypE</i> region in MJM1100 into pEVs79<br>Gibson assembly cloning of downstream <i>sypE</i> region in MJM1100 into pEVs79<br>Verification of $\Delta$ sypE by flanking the upstream/downstream junction<br>Verification of $\Delta$ sypE; no product due to one primer binding within <i>sypE</i>     | <b>MJM3416</b>                                 |
| <b>MJM3410 =</b><br><b>MJM1130 <math>\Delta</math>sypE</b>                                                                   |      | Gib_MB11B1_sypE_US_for<br>Gib_MB11B1_sypE_DS_for<br>for_ver_sypE<br>MB11B1_indel_for         | Gib_MB11B1_sypE_US_rev<br>Gib_MB11B1_sypE_DS_rev<br>rev_ver_sypE<br>MB11B1_indel_rev         | 1.6 kb<br>1.6 kb<br>732 bp<br>779 bp   | Gibson assembly cloning of upstream <i>sypE</i> region in MJM1130 into pEVs79<br>Gibson assembly cloning of downstream <i>sypE</i> region in MJM1130 into pEVs79<br>Verification of $\Delta$ sypE by flanking the upstream/downstream junction<br>Verification of $\Delta$ sypE; no product due to both primers binding within <i>sypE</i>   | <b>MJM3409</b>                                 |
| <b>MJM3354 =</b><br><b>MJM1100 <i>sypE</i>(ntG33A)</b>                                                                       |      | Gib_ES114_sypE_N_for<br>Gib_ES114_sypE_C_for<br>Gib_pEVs79_ES_sypE_for<br>ES114_indel_for    | Gib_ES114_sypE_N_rev<br>Gib_ES114_sypE_C_rev<br>Gib_pEVs79_ES_sypE_rev<br>ES114_indel_rev    | 332 bp<br>1786 bp<br>2118 bp<br>802 bp | Gibson assembly cloning of N-terminal <i>sypE</i> in MJM1100 into pEVs107<br>Gibson assembly cloning of C-terminal <i>sypE</i> in MJM1100 into pEVs107<br>Gibson assembly cloning of <i>sypE</i> (ntG33A) into pEVs79<br>Verification of <i>sypE</i> (ntG33A); stronger band with original allele.                                           | <b>MJM3340</b><br><b>and</b><br><b>MJM3352</b> |
| <b>MJM3397 =</b><br><b>MJM1130 <i>sypE</i>(nt33::G)</b>                                                                      |      | Gib_MB11B1_sypE_N_for<br>Gib_MB11B1_sypE_C_for<br>Gib_pEVs79_MB_sypE_for<br>MB11B1_indel_for | Gib_MB11B1_sypE_N_rev<br>Gib_MB11B1_sypE_C_rev<br>Gib_pEVs79_MB_sypE_rev<br>MB11B1_indel_rev | 332 bp<br>1786 bp<br>2118 bp<br>779 bp | Gibson assembly cloning of N-terminal <i>sypE</i> in MJM1130 into pEVs107<br>Gibson assembly cloning of C-terminal <i>sypE</i> in MJM1130 into pEVs107<br>Gibson assembly cloning of <i>sypE</i> (nt33::G) into pEVs79<br>Verification of <i>sypE</i> (nt33::G); stronger band with corrected allele.                                        | <b>MJM3338</b><br><b>and</b><br><b>MJM3351</b> |

## File S1

>gBlock\_erm

```
GGTCAGCCTCTAATGGCTCGTAAGATAGTGTAGGAAGCTTTATCGAACTGCGCGAAAGATCCCGAAGTTCCTATTCTCT
AGAAAGTATAGGAACTTCCTTAGAAGCAAACCTAAGAGTGTGTTGATAGTGCAGTATCTTAAAATTTTGTATAATAGGA
ATTGAAGTTAAATTAGATGCTAAAAATTTGTAATTAAGAAGGAGTGATTACATGAACAAAAATATAAAATATTCTCAA
ACTTTTTAACGAGTGAAAAAGTACTCAACCAAATAATAAAACAATTGAATTTAAAAGAAACCGATACCGTTTACGAAAT
TGGAACAGGTAAAGGGCATTAAACGACGAAACTGGCTAAAATAAGTAAACAGGTAACGTCTATTGAATTAGACAGTCAT
CTATTCAACTTATCGTCAGAAAAATTA AAACTGAATACTCGTGTCACTTTAATTCACCAAGATATTCTACAGTTTCAAT
TCCCTAACAAACAGAGGTATAAAATTTGTTGGGAGTATTCCCTTACCATTTAAGCACACAAATTATTA AAAAGTGGTTTT
TGAAAGCCATGCGTCTGACATCTATCTGATTGTTGAAGAAGGATTCTACAAGCGTACCTTGGATATTCACCGAACACTA
GGTTTGCTCTTGACACTCAAGTCTCGATTTCAGCAATTGCTTAAGCTGCCAGCGGAATGCTTTCATCCTAAACAAAAG
TAAACAGTGTCTTAATAAAAACCTACCCGCCATACCACAGATGTTCCAGATAAATATTGGAAGCTATATACGTACTTTGT
TTCAAATGGGTCAATCGAGAATATCGTCAACTGTTTACTAAAAATCAGTTTCATCAAGCAATGAAACACGCCAAAGTA
AACAATTTAAGTACCGTTACTTATGAGCAAGTATTGTCTATTTTTAATAGTTATCTATTATTTAACGGGAGGAAATAAT
CTAGAATGCGAGAGTAGGGAAGTCCGAAGTTCCTATTCTCTAGAAAGTATAGGAACTTCAGCGCTCATGCACTTGATT
CCGGATCCCTAATTAGCGAACGCAGCTGGCTCTCCAA
```
